# Supplementary material
Source: HighWire-hosted journal article supplement (https://tobaccocontrol.bmj.com/content/tobaccocontrol-2016-053291)
Supplement: inline-supplementary-material-1 [file inline-supplementary-material-1.pdf]

Appendix: Supplementary Tables

Table A1: Unweighted Sample Sizes for Analysis of Smoking Outcomes at One-Year Follow Up by Baseline E-cigarette Use; Imputed Sample

| Baseline smoking status:                                            | ---Never smoked by 12 <sup>th</sup> grade -- |                                        | ----- Smoked by 12 <sup>th</sup> grade ----- |                                                         |                                                       |
|---------------------------------------------------------------------|----------------------------------------------|----------------------------------------|----------------------------------------------|---------------------------------------------------------|-------------------------------------------------------|
|                                                                     | All                                          | See "great risk" in smoking cigarettes | All                                          | Inactive Smokers at 12 <sup>th</sup> grade <sup>a</sup> | Active Smokers at 12 <sup>th</sup> grade <sup>a</sup> |
| n                                                                   | 246                                          | 204                                    | 101                                          | 66                                                      | 35                                                    |
| Use of e-cigarette within 30 days of 12 <sup>th</sup> grade survey: |                                              |                                        |                                              |                                                         |                                                       |
| No                                                                  | 235                                          | 194                                    | 57                                           | 46                                                      | 11                                                    |
| Yes                                                                 | 11                                           | 10                                     | 44                                           | 20                                                      | 24                                                    |

<sup>a</sup> Inactive smokers defined as those who did not smoke in 30 days prior to the 12<sup>th</sup> grade survey, and active smokers defined as those who smoked in the 30 days prior to the 12<sup>th</sup> grade survey

Table A2: Unweighted Sample Sizes for Analysis of Smoking Outcomes at One-Year Follow Up by Baseline E-cigarette Use; Observed Sample

| Outcome:                                                            | Smoking Incidence by Follow Up               |                                        | Annual Prevalence of Smoking at Follow Up    |                                                                     |                                                              |
|---------------------------------------------------------------------|----------------------------------------------|----------------------------------------|----------------------------------------------|---------------------------------------------------------------------|--------------------------------------------------------------|
| Baseline smoking status:                                            | ---Never smoked by 12 <sup>th</sup> grade -- |                                        | ----- Smoked by 12 <sup>th</sup> grade ----- |                                                                     |                                                              |
|                                                                     | All                                          | See "great risk" in smoking cigarettes | All                                          | Did not smoke within 30 days prior to 12 <sup>th</sup> grade survey | Smoked within 30 days prior to 12 <sup>th</sup> grade survey |
| n                                                                   | 226                                          | 185                                    | 107                                          | 71                                                                  | 35                                                           |
| Use of e-cigarette within 30 days of 12 <sup>th</sup> grade survey: |                                              |                                        |                                              |                                                                     |                                                              |
| No                                                                  | 213                                          | 175                                    | 58                                           | 47                                                                  | 11                                                           |
| Yes                                                                 | 13                                           | 10                                     | 49                                           | 24                                                                  | 24                                                           |

Table A3: Comparison of Follow-Up Responders with Target Responders, With and Without Use of Attrition Weights (95% Relative Risk Confidence Intervals in Brackets)

|                                              | Target<br>follow-up<br>subsample<br><br>(n=822) | % of sample<br>Longitudinal<br>follow-up<br>responders, no<br>attrition weights<br>(n=347) | Longitudinal<br>follow-up<br>responders, with<br>attrition weights<br>(n=347) |
|----------------------------------------------|-------------------------------------------------|--------------------------------------------------------------------------------------------|-------------------------------------------------------------------------------|
| Used e-cigarette in past 30 days at baseline | 17.43<br>[14.75-20.12]                          | 14.53<br>[10.79-18.27]                                                                     | 15.60<br>[11.73-19.47]                                                        |
| See “great risk” in smoking at baseline      | 81.29<br>[78.48-84.11]                          | 82.74<br>[78.56-86.91]                                                                     | 80.88<br>[76.40-85.36]                                                        |
| Never smoked a cigarette at baseline         | 69.03<br>[65.77-72.30]                          | 72.99<br>[68.21-77.77]                                                                     | 71.05<br>[66.15-75.94]                                                        |
| Smoked in last 30 days at baseline           | 10.63<br>[8.58-12.69]                           | 8.21<br>[5.36-11.06]                                                                       | 10.13<br>[6.83-13.44]                                                         |
| Female                                       | 55.53<br>[51.94-59.12]                          | 62.43*<br>[57.12-67.74]                                                                    | 56.25<br>[50.76-61.76]                                                        |
| Non-white                                    | 42.33<br>[38.73-45.92]                          | 35.31*<br>[30.06-40.55]                                                                    | 39.89<br>[34.44-45.33]                                                        |
| Binge drinking in past two weeks             | 16.63<br>[14.05-19.22]                          | 14.96<br>[11.14-18.78]                                                                     | 16.12<br>[12.19-20.04]                                                        |
| Smoked marijuana in the past 30 days         | 21.28<br>[18.49-24.06]                          | 16.53*<br>[12.68-20.37]                                                                    | 18.93<br>[14.83-23.03]                                                        |

Note: Variable definitions are in Table 1. All analyses include follow-up weights to take into account oversampling of respondents with high levels of drug use.

\* p<.05; estimate significantly differs from target follow-up sample

Table A4: Smoking Incidence at One-Year Follow Up among 12<sup>th</sup> Grade Students by Baseline E-cigarette Use: Full Results of Adjusted Relative Risk Estimates (Standard Errors and 95% Relative Risk Confidence Intervals in Brackets)<sup>a</sup>

|                                 | Never smoked by 12 <sup>th</sup> grade |                                        | Smoked by 12 <sup>th</sup> grade |                                                         |                                                         |
|---------------------------------|----------------------------------------|----------------------------------------|----------------------------------|---------------------------------------------------------|---------------------------------------------------------|
|                                 | All                                    | See "great risk" in smoking cigarettes | All                              | Inactive Smokers at 12 <sup>th</sup> grade <sup>a</sup> | Active Smokers at 12 <sup>th</sup> grade <sup>a,b</sup> |
| n                               | 246                                    | 204                                    | 101                              | 66                                                      | 35                                                      |
| Substance use at baseline       |                                        |                                        |                                  |                                                         |                                                         |
| E-cigarette use in last 30 days | 4.78**<br>[1.91-11.96]                 | 4.64**<br>[1.66-12.93]                 | 2.15**<br>[1.49-3.12]            | 2.26**<br>[1.22-4.18]                                   | 1.32<br>[0.89-1.96]                                     |
| Binge drinking in last 30 days  | 0.91<br>[0.20-4.08]                    | 1.19<br>[0.26-5.53]                    | 0.79**<br>[0.75-0.84]            | 0.53<br>[0.24-1.2]                                      | 0.94<br>[0.88-1.01]                                     |
| Marijuana use in last 30 days   | 1.75<br>[0.67-4.59]                    | 1.32<br>[0.42-4.16]                    | 1.35**<br>[1.1-1.65]             | 1.63<br>[0.92-2.89]                                     | 0.94<br>[0.87-1.02]                                     |
| Female                          | 1.24<br>[0.48-3.17]                    | 1.12<br>[0.4-3.11]                     | 1.18**<br>[1.12-1.24]            | 0.88**<br>[0.86-0.9]                                    |                                                         |
| Non-white                       | 1.19<br>[0.49-2.86]                    | 1.25<br>[0.47-3.32]                    | 0.73*<br>[0.57-0.94]             | 0.68<br>[0.42-1.07]                                     |                                                         |
| Constant                        | 0.05**<br>[0.02-0.12]                  | 0.06**<br>[0.02-0.14]                  | 0.36**<br>[0.25-0.52]            | 0.34**<br>[0.19-0.59]                                   |                                                         |

\* p<.05; \*\* p<.01

<sup>a</sup>Inactive smokers defined as those who did not smoke in 30 days prior to the 12<sup>th</sup> grade survey, and active smokers defined as those who smoked in the 30 days prior to the 12<sup>th</sup> grade survey

<sup>b</sup>This model did not converge when demographic variables of sex and race were included.

Table A5: Change in Perceived Risk of Smoking Away From “Great Risk” At Follow-up Wave by Baseline E-cigarette Use: Full Results of Adjusted Relative Risk Estimates (Standard Errors and 95% Relative Risk Confidence Intervals in Brackets)<sup>a</sup>

| Smoking status:                 | --- Never smoked by 12 <sup>th</sup> grade --- |                                        | Smoked by 12 <sup>th</sup> grade |
|---------------------------------|------------------------------------------------|----------------------------------------|----------------------------------|
|                                 | All                                            | See “great risk” in smoking cigarettes | All                              |
| n                               | 246                                            | 204                                    | 101                              |
| Substance use at baseline       |                                                |                                        |                                  |
| E-cigarette use in last 30 days | 4.73**<br>[2.07-10.82]                         | 3.74**<br>[1.57-8.89]                  | 0.69<br>[0.19-2.49]              |
| Binge drinking in last 30 days  | 1.07<br>[0.22-5.23]                            | 1.02<br>[0.21-5.02]                    | 1.15<br>[0.34-3.98]              |
| Marijuana use in last 30 days   | 0.83<br>[0.19-3.67]                            | 0.78<br>[0.18-3.32]                    | 0.93<br>[0.28-3.06]              |
| Female                          | 0.50<br>[0.24-1.04]                            | 0.48<br>[0.23-1.02]                    | 0.46<br>[0.15-1.39]              |
| Non-white                       | 0.94<br>[0.41-2.15]                            | 1.04<br>[0.45-2.41]                    | 1.16<br>[0.44-3.07]              |
| Constant                        | 0.13**<br>[0.07-0.24]                          | 0.16**<br>[0.09-0.29]                  | 0.19**<br>[0.07-0.57]            |

\*\* p<.01

<sup>a</sup> Estimates weighted

Note: Differences across e-cigarette use groups modeled in a binomial regression with a log link. Analysis includes five cases with imputed data for the dependent variable. Results changed only trivially when these five cases were removed from the analysis.
